# Supplementary material for: Association between Vitamin A and E Forms and Prostate Cancer Risk in the Singapore Prostate Cancer Study
Source: MDPI journal article supplement (doi:10.3390/nu15122677), 2023-06-08
Supplement: s1 [file s1]

**Supplementary Table S1. Other clinical characteristics of cases and controls**

|                            |           | Cases       | Controls    |
|----------------------------|-----------|-------------|-------------|
| Grade <sup>a</sup> , n (%) |           |             |             |
|                            | Low       | 62 (39.7%)  | -           |
|                            | High      | 94 (60.3%)  | -           |
| Stage <sup>b</sup> , n (%) |           |             |             |
|                            | Localized | 119 (76.3%) | -           |
|                            | Advanced  | 37 (23.7%)  | -           |
| PSA (ng/mL), Median (IQR)  |           | 4.32 (7.72) | 1.35 (2.88) |

<sup>a</sup> Grade of prostate cancer comprised two categories: ‘Low grade’ (Gleason score  $\geq 7$ ) and ‘High grade’ (Gleason score  $<7$ ).

<sup>b</sup> Stage of prostate cancer was based on the sixth edition of the TNM (tumor–node– metastasis) staging system, with cases being classified as ‘Localized’ (T1 or T2, N0, M0) or ‘Advanced’ (a) M0, T3/T4 & N0; (b) T1-T4 with any N; (c) any T, any N and (d) M1, M1b, M1c).

<sup>c</sup> For 45 cases, the measurement of PSA was not available. For 47 controls, the measurement of PSA was not available.

**Supplementary Table S2. Associations between serum vitamin A and E forms and prostate cancer risk further adjusted for energy intake**

|                             | Cases (n=156) | Controls (n=118)   | Crude OR (95% CI) | Adjusted OR (95% CI) <sup>a</sup> |
|-----------------------------|---------------|--------------------|-------------------|-----------------------------------|
|                             | n (%)         | n (%)              |                   |                                   |
| Retinol                     |               |                    |                   |                                   |
| ≤ Median of 60.9 μg/dL      | 20 (12.8)     | 59 (50)            | 1.00 (Ref)        | 1.00 (Ref)                        |
| > Median of 60.9 μg/dL      | 136 (87.2)    | 59 (50)            | 6.80 (3.76–12.30) | 6.09 (2.79–13.30)                 |
| Lutein                      |               |                    |                   |                                   |
| ≤ Median of 11.8 μg/dL      | 34 (21.8)     | 59 (50)            | 1.00 (Ref)        | 1.00 (Ref)                        |
| > Median of 11.8 μg/dL      | 122 (78.2)    | 59 (50)            | 3.59 (2.12–6.06)  | 2.02 (1.03–3.94)                  |
| Zeaxanthin                  |               |                    |                   |                                   |
| Tertile 1 (≤ 3.3 μg/dL)     | 34 (21.8)     | 41 (34.7)          | 1.00 (Ref)        | 1.00 (Ref)                        |
| Tertile 2 (3.3–4.9 μg/dL)   | 67 (42.9)     | 38 (32.2)          | 2.13 (1.16–3.89)  | 1.39 (0.64–3.02)                  |
| Tertile 3 (> 4.9 μg/dL)     | 55 (35.3)     | 39 (33.1)          | 1.70 (0.92–3.14)  | 1.22 (0.54–2.77)                  |
|                             |               | <i>P</i> for trend | 0.11              | 0.64                              |
| α-Cryptoxanthin             |               |                    |                   |                                   |
| Tertile 1 (≤ 44.7 μg/dL)    | 45 (28.8)     | 40 (34.2)          | 1.00 (Ref)        | 1.00 (Ref)                        |
| Tertile 2 (44.7–82.9 μg/dL) | 43 (27.6)     | 38 (32.5)          | 1.01 (0.55–1.85)  | 1.22 (0.55–2.73)                  |
| Tertile 3 (> 82.9 μg/dL)    | 68 (43.6)     | 39 (33.3)          | 1.55 (0.87–2.77)  | 1.94 (0.91–4.14)                  |
|                             |               | <i>P</i> for trend | 0.13              | 0.081                             |
| β-Cryptoxanthin             |               |                    |                   |                                   |
| Tertile 1 (≤ 7.8 μg/dL)     | 29 (18.6)     | 40 (33.9)          | 1.00 (Ref)        | 1.00 (Ref)                        |
| Tertile 2 (7.8–16.0 μg/dL)  | 56 (35.9)     | 39 (33.1)          | 1.98 (1.06–3.71)  | 1.71 (0.75–3.86)                  |
| Tertile 3 (>16.0 μg/dL )    | 71 (45.5)     | 39 (33.1)          | 2.51 (1.35–4.66)  | 1.92 (0.86–4.27)                  |
|                             |               | <i>P</i> for trend | 0.0045            | 0.12                              |
| α-Carotene                  |               |                    |                   |                                   |
| ≤ Median of 0.50 μg/dL      | 64 (41)       | 86 (72.9)          | 1.00 (Ref)        | 1.00 (Ref)                        |
| > Median of 0.50 μg/dL      | 92 (59)       | 32 (27.1)          | 3.86 (2.31–6.47)  | 3.25 (1.66–6.36)                  |
| β-Carotene                  |               |                    |                   |                                   |
| ≤ Median of 4.2 μg/dL       | 30 (19.2)     | 60 (50.8)          | 1.00 (Ref)        | 1.00 (Ref)                        |
| > Median of 4.2 μg/dL       | 126 (80.8)    | 58 (49.2)          | 4.34 (2.54–7.44)  | 3.00 (1.51–5.96)                  |
| Lycopene                    |               |                    |                   |                                   |
| Tertile 1 (≤3.9 μg/dL)      | 47 (30.3)     | 40 (34.5)          | 1.00 (Ref)        | 1.00 (Ref)                        |
| Tertile 2 (3.9–7.5 μg/dL)   | 44 (28.4)     | 38 (32.8)          | 0.99 (0.54–1.8)   | 1.01 (0.46–2.24)                  |
| Tertile 3 (>7.5 μg/dL)      | 64 (41.3)     | 38 (32.8)          | 1.43 (0.80–2.57)  | 0.92 (0.43–1.98)                  |
|                             |               | <i>P</i> for trend | 0.22              | 0.84                              |
| Ubiquinone                  |               |                    |                   |                                   |
| Tertile 1 ≤ (29.3 μg/dL)    | 32 (20.5)     | 40 (34.5)          | 1.00 (Ref)        | 1.00 (Ref)                        |
| Tertile 2 (29.3–41.2 μg/dL) | 45 (28.8)     | 37 (31.9)          | 1.52 (0.80–2.87)  | 1.21 (0.54–2.72)                  |
| Tertile 3 (>41.2 μg/dL)     | 79 (50.6)     | 39 (33.6)          | 2.53 (1.39–4.63)  | 2.31 (1.06–5.02)                  |
|                             |               | <i>P</i> for trend | 0.0022            | <b>0.030</b>                      |
| δ-Tocopherol                |               |                    |                   |                                   |
| Tertile 1 (≤ 9.7 μg/dL)     | 59 (37.8)     | 40 (33.9)          | 1.00 (Ref)        | 1.00 (Ref)                        |

|                             |           |                    |                  |                  |
|-----------------------------|-----------|--------------------|------------------|------------------|
| Tertile 2 (9.7–13.1 µg/dL)  | 45 (28.8) | 39 (33.1)          | 0.78 (0.43–1.41) | 0.92 (0.43–1.96) |
| Tertile 3 (>13.1 µg/dL)     | 52 (33.3) | 39 (33.1)          | 0.90 (0.51–1.61) | 1.13 (0.53–2.4)  |
|                             |           | <i>P</i> for trend | 0.72             | 0.78             |
| <b>γ-Tocopherol</b>         |           |                    |                  |                  |
| Tertile 1 (≤ 47.2 µg/dL)    | 54 (34.6) | 41 (34.7)          | 1.00 (Ref)       | 1.00 (Ref)       |
| Tertile 2 (47.2–74.9 µg/dL) | 66 (42.3) | 38 (32.2)          | 1.32 (0.75–2.33) | 1.77 (0.82–3.84) |
| Tertile 3 (>74.9 µg/dL)     | 36 (23.1) | 39 (33.1)          | 0.70 (0.38–1.29) | 0.63 (0.29–1.38) |
|                             |           | <i>P</i> for trend | 0.30             | 0.29             |
| <b>α-Tocopherol</b>         |           |                    |                  |                  |
| Tertile 1 (≤1240 µg/dL)     | 26 (16.7) | 40 (33.9)          | 1.00 (Ref)       | 1.00 (Ref)       |
| Tertile 2 (1240–1560 µg/dL) | 51 (32.7) | 39 (33.1)          | 2.01 (1.05–3.84) | 1.6 (0.7–3.67)   |
| Tertile 3 (>1560 µg/dL)     | 79 (50.6) | 39 (33.1)          | 3.12 (1.67–5.82) | 2.37 (1.05–5.34) |
|                             |           | <i>P</i> for trend | 0.00041          | <b>0.038</b>     |
| <b>δ-Tocotrienol</b>        |           |                    |                  |                  |
| Tertile 1 (≤ 0.7 µg/dL)     | 26 (16.7) | 42 (35.6)          | 1.00 (Ref)       | 1.00 (Ref)       |
| Tertile 2 (0.7–1.1 µg/dL)   | 39 (25)   | 43 (36.4)          | 1.47 (0.76–2.82) | 1.33 (0.58–3.06) |
| Tertile 3 (>1.1 µg/dL)      | 91 (58.3) | 33 (28)            | 4.45 (2.37–8.37) | 3.54 (1.58–7.92) |
|                             |           | <i>P</i> for trend | 0.0013           | <b>0.0013</b>    |
| <b>γ-Tocotrienol</b>        |           |                    |                  |                  |
| Tertile 1 (≤ 0.9 µg/dL)     | 43 (27.6) | 41 (34.7)          | 1.00 (Ref)       | 1.00 (Ref)       |
| Tertile 2 (0.9–1.5 µg/dL)   | 38 (24.4) | 43 (36.4)          | 0.84 (0.46–1.55) | 0.99 (0.44–2.19) |
| Tertile 3 (>1.5 µg/dL)      | 75 (48.1) | 34 (28.8)          | 2.10 (1.17–3.79) | 2.95 (1.35–6.48) |
|                             |           | <i>P</i> for trend | 0.0098           | <b>0.0064</b>    |
| <b>α-Tocotrienol</b>        |           |                    |                  |                  |
| Tertile 1 (≤ 0.9 µg/dL)     | 39 (25)   | 44 (37.3)          | 1.00 (Ref)       | 1.00 (Ref)       |
| Tertile 2 (0.9–1.5 µg/dL)   | 35 (22.4) | 35 (29.7)          | 1.13 (0.6–2.13)  | 1.05 (0.46–2.37) |
| Tertile 3 (>1.5 µg/dL)      | 82 (52.6) | 39 (33.1)          | 2.37 (1.33–4.22) | 2.57 (1.20–5.50) |
|                             |           | <i>P</i> for trend | 0.0024           | <b>0.013</b>     |

<sup>a</sup> Multiple logistic regression model adjusted for age, education, family cancer history, BMI, sunburn exposure, skin colour, eye colour and estimated daily energy intake. CI, confidence interval; OR, odds ratio.

**Supplementary Table S3. Associations between serum vitamin A and E forms and prostate cancer risk by tumor grade<sup>a</sup>**

|                             | Tumor grade of prostate cancer      |                                      | Controls ( <i>n</i> =124) | Tumor grade of prostate cancer  |                                  |
|-----------------------------|-------------------------------------|--------------------------------------|---------------------------|---------------------------------|----------------------------------|
|                             | Low ( <i>n</i> =62)<br><i>n</i> (%) | High ( <i>n</i> =94)<br><i>n</i> (%) |                           | Low<br>OR (95% CI) <sup>b</sup> | High<br>OR (95% CI) <sup>b</sup> |
| Retinol                     |                                     |                                      |                           |                                 |                                  |
| ≤ Median of 60.9 μg/dL      | 11 (17.7)                           | 9 (9.6)                              | 59 (50)                   | 1.00 (Ref)                      | 1.00 (Ref)                       |
| > Median of 60.9 μg/dL      | 51 (82.3)                           | 85 (90.4)                            | 59 (50)                   | 6.24 (2.16–18.00)               | 7.81 (2.95–20.70)                |
| Lutein                      |                                     |                                      |                           |                                 |                                  |
| ≤ Median of 60.9 μg/dL      | 16 (25.8)                           | 18 (19.1)                            | 59 (50)                   | 1.00 (Ref)                      | 1.00 (Ref)                       |
| > Median of 60.9 μg/dL      | 46 (74.2)                           | 76 (80.9)                            | 59 (50)                   | 1.39 (0.56–3.45)                | 2.80 (1.25–6.25)                 |
| Zeaxanthin                  |                                     |                                      |                           |                                 |                                  |
| Tertile 1 (≤ 3.3 μg/dL)     | 16 (25.8)                           | 18 (19.1)                            | 41 (34.7)                 | 1.00 (Ref)                      | 1.00 (Ref)                       |
| Tertile 2 (3.3–4.9 μg/dL)   | 26 (41.9)                           | 41 (43.6)                            | 38 (32.2)                 | 1.40 (0.48–4.09)                | 1.69 (0.68–4.20)                 |
| Tertile 3 (> 4.9 μg/dL)     | 20 (32.3)                           | 35 (37.2)                            | 39 (33.1)                 | 0.76 (0.26–2.17)                | 1.48 (0.57–3.9)                  |
|                             |                                     |                                      | <i>P</i> for trend        | 0.58                            | 0.45                             |
| α-Cryptoxanthin             |                                     |                                      |                           |                                 |                                  |
| Tertile 1 (≤ 44.7 μg/dL)    | 22 (35.5)                           | 23 (24.5)                            | 40 (34.2)                 | 1.00 (Ref)                      | 1.00 (Ref)                       |
| Tertial 2 (44.7–82.9 μg/dL) | 14 (22.6)                           | 29 (30.9)                            | 38 (32.5)                 | 0.73 (0.25–2.15)                | 1.42 (0.55–3.70)                 |
| Tertile 3 (> 82.9 μg/dL)    | 26 (41.9)                           | 42 (44.7)                            | 39 (33.3)                 | 1.34 (0.48–3.72)                | 2.26 (0.94–5.42)                 |
|                             |                                     |                                      | <i>P</i> for trend        | 0.53                            | 0.064                            |
| β-Cryptoxanthin             |                                     |                                      |                           |                                 |                                  |
| Tertile 1 (≤ 7.8 μg/dL)     | 12 (19.4)                           | 17 (18.1)                            | 40 (33.9)                 | 1.00 (Ref)                      | 1.00 (Ref)                       |
| Tertile 2 (7.8–16.0 μg/dL)  | 21 (33.9)                           | 35 (37.2)                            | 39 (33.1)                 | 1.28 (0.42–3.92)                | 1.81 (0.7–4.70)                  |
| Tertile 3 (>16.0 μg/dL)     | 29 (46.8)                           | 42 (44.7)                            | 39 (33.1)                 | 1.66 (0.57–4.86)                | 1.94 (0.77–4.85)                 |
|                             |                                     |                                      | <i>P</i> for trend        | 0.35                            | 0.18                             |
| α-Carotene                  |                                     |                                      |                           |                                 |                                  |
| ≤ Median of 0.50 μg/dL      | 24 (38.7)                           | 40 (42.6)                            | 86 (72.9)                 | 1.00 (Ref)                      | 1.00 (Ref)                       |
| > Median of 0.50 μg/dL      | 38 (61.3)                           | 54 (57.4)                            | 32 (27.1)                 | 3.31 (1.35–8.08)                | 3.78 (1.74–8.21)                 |
| β-Carotene                  |                                     |                                      |                           |                                 |                                  |
| ≤ Median of 4.2 μg/dL       | 12 (19.4)                           | 18 (19.1)                            | 60 (50.8)                 | 1.00 (Ref)                      | 1.00 (Ref)                       |
| > Median of 4.2 μg/dL       | 50 (80.6)                           | 76 (80.9)                            | 58 (49.2)                 | 3.38 (1.27–9.04)                | 3.28 (1.44–7.49)                 |
| Lycopene                    |                                     |                                      |                           |                                 |                                  |
| Tertile 1 (≤3.9 μg/dL)      | 20 (32.3)                           | 27 (29)                              | 40 (34.5)                 | 1.00 (Ref)                      | 1.00 (Ref)                       |
| Tertile 2 (3.9–7.5 μg/dL)   | 18 (29)                             | 26 (28)                              | 38 (32.8)                 | 0.89 (0.31–2.6)                 | 1.00 (0.39–2.52)                 |
| Tertile 3 (>7.5 μg/dL)      | 24 (38.7)                           | 40 (43)                              | 38 (32.8)                 | 0.75 (0.27–2.07)                | 1.14 (0.48–2.73)                 |
|                             |                                     |                                      | <i>P</i> for trend        | 0.58                            | 0.76                             |
| Ubiquinone                  |                                     |                                      |                           |                                 |                                  |
| Tertile 1 ≤ (29.3 μg/dL)    | 15 (24.2)                           | 17 (18.1)                            | 40 (34.5)                 | 1.00 (Ref)                      | 1.00 (Ref)                       |
| Tertile 2 (29.3–41.2 μg/dL) | 17 (27.4)                           | 28 (29.8)                            | 37 (31.9)                 | 1.15 (0.38–3.49)                | 1.59 (0.61–4.1)                  |
| Tertile 3 (>41.2 μg/dL)     | 30 (48.4)                           | 49 (52.1)                            | 39 (33.6)                 | 1.55 (0.57–4.21)                | 2.95 (1.18–7.34)                 |

|                                |           |           |                    |                    |                   |              |
|--------------------------------|-----------|-----------|--------------------|--------------------|-------------------|--------------|
|                                |           |           |                    | <i>P</i> for trend | 0.38              | <b>0.018</b> |
| <b>δ-Tocopherol</b>            |           |           |                    |                    |                   |              |
| Tertile 1 ( $\leq 9.7$ µg/dL)  | 27 (43.5) | 32 (34)   | 40 (33.9)          | 1.00 (Ref)         | 1.00 (Ref)        |              |
| Tertile 2 (9.7–13.1 µg/dL)     | 17 (27.4) | 28 (29.8) | 39 (33.1)          | 1.26 (0.46–3.40)   | 0.94 (0.39–2.26)  |              |
| Tertile 3 ( $>13.1$ µg/dL)     | 18 (29)   | 34 (36.2) | 39 (33.1)          | 0.85 (0.31–2.29)   | 1.09 (0.45–2.61)  |              |
|                                |           |           | <i>P</i> for trend | 0.80               | 0.86              |              |
| <b>γ-Tocopherol</b>            |           |           |                    |                    |                   |              |
| Tertile 1 ( $\leq 47.2$ µg/dL) | 25 (40.3) | 29 (30.9) | 41 (34.7)          | 1.00 (Ref)         | 1.00 (Ref)        |              |
| Tertile 2 (47.2–74.9 µg/dL)    | 24 (38.7) | 42 (44.7) | 38 (32.2)          | 1.17 (0.42–3.25)   | 2.08 (0.83–5.17)  |              |
| Tertile 3 ( $>74.9$ µg/dL)     | 13 (21)   | 23 (24.5) | 39 (33.1)          | 0.36 (0.12–1.09)   | 0.73 (0.29–1.81)  |              |
|                                |           |           | <i>P</i> for trend | 0.085              | 0.47              |              |
| <b>α-Tocopherol</b>            |           |           |                    |                    |                   |              |
| $\leq$ Median of 1402 µg/dL    | 25 (40.3) | 24 (25.5) | 59 (50.0)          | 1.00 (Ref)         | 1.00 (Ref)        |              |
| $>$ Median of 1402 µg/dL       | 37 (59.7) | 70 (74.5) | 59 (50.0)          | 2.00 (0.82–4.87)   | 2.51 (1.15–5.45)  |              |
| <b>δ-Tocotrienol</b>           |           |           |                    |                    |                   |              |
| Tertile 1 ( $\leq 0.7$ µg/dL)  | 11 (17.7) | 15 (16)   | 42 (35.6)          | 1.00 (Ref)         | 1.00 (Ref)        |              |
| Tertile 2 (0.7–1.1 µg/dL)      | 13 (21)   | 26 (27.7) | 43 (36.4)          | 1.30 (0.42–4.06)   | 1.63 (0.61–4.33)  |              |
| Tertile 3 ( $>1.1$ µg/dL)      | 38 (61.3) | 53 (56.4) | 33 (28)            | 3.06 (1.05–8.95)   | 4.25 (1.66–10.90) |              |
|                                |           |           | <i>P</i> for trend | <b>0.031</b>       | <b>0.0020</b>     |              |
| <b>γ-Tocotrienol</b>           |           |           |                    |                    |                   |              |
| Tertile 1 ( $\leq 0.9$ µg/dL)  | 15 (24.2) | 28 (29.8) | 41 (34.7)          | 1.00 (Ref)         | 1.00 (Ref)        |              |
| Tertile 2 (0.9–1.5 µg/dL)      | 16 (25.8) | 22 (23.4) | 43 (36.4)          | 1.31 (0.44–3.92)   | 0.73 (0.29–1.84)  |              |
| Tertile 3 ( $>1.5$ µg/dL)      | 31 (50)   | 44 (46.8) | 34 (28.8)          | 4.35 (1.48–12.80)  | 2.14 (0.9–5.10)   |              |
|                                |           |           | <i>P</i> for trend | <b>0.0068</b>      | 0.088             |              |
| <b>α-Tocotrienol</b>           |           |           |                    |                    |                   |              |
| $\leq$ Median of 1.1µg/dL      | 22 (35.5) | 28 (29.8) | 63 (53.4)          | 1.00 (Ref)         | 1.00 (Ref)        |              |
| $>$ Median of 1.1µg/dL         | 40 (64.5) | 66 (70.2) | 55 (46.6)          | 2.76 (1.16–6.55)   | 2.53 (1.22–5.26)  |              |

<sup>a</sup> Grade of prostate cancer comprised two categories: ‘Low grade (Gleason score  $\geq 7$ ) and ‘High grade’ (Gleason score  $<7$ ).

<sup>b</sup> Multiple logistic regression model adjusted for age, education, family cancer history, BMI, sun exposure, skin colour, and eye colour. CI, confidence interval; OR, odds ratio.

**Supplementary Table S4. Associations between serum vitamin A and E forms and prostate cancer by tumor stage<sup>a</sup>**

|                             | Tumor stage of prostate cancer |                          |                           | Tumor stage of prostate cancer        |                                      |
|-----------------------------|--------------------------------|--------------------------|---------------------------|---------------------------------------|--------------------------------------|
|                             | Localized (n=119)<br>n (%)     | Advanced (n=37)<br>n (%) | Controls (n=124)<br>n (%) | Localized<br>OR (95% CI) <sup>a</sup> | Advanced<br>OR (95% CI) <sup>a</sup> |
| Retinol                     |                                |                          |                           |                                       |                                      |
| ≤ Median of 60.9 µg/dL      | 16 (13.4)                      | 4 (10.8)                 | 59 (50)                   | 1.00 (Ref)                            | 1.00 (Ref)                           |
| > Median of 60.9 µg/dL      | 103 (86.6)                     | 33 (89.2)                | 59 (50)                   | 6.11 (2.65-14.10)                     | 7.93 (2.11-29.80)                    |
| Lutein                      |                                |                          |                           |                                       |                                      |
| ≤ Median of 11.8 µg/dL      | 25 (21)                        | 9 (24.3)                 | 59 (50)                   | 1.00 (Ref)                            | 1.00 (Ref)                           |
| > Median of 11.8 µg/dL      | 94 (79)                        | 28 (75.7)                | 59 (50)                   | 2.12 (1.02-4.38)                      | 3.51 (1.11-11.1)                     |
| Zeaxanthin                  |                                |                          |                           |                                       |                                      |
| Tertile 1 (≤ 3.3 µg/dL)     | 28 (23.5)                      | 6 (16.2)                 | 41 (34.7)                 | 1.00 (Ref)                            | 1.00 (Ref)                           |
| Tertile 2 (3.3–4.9 µg/dL)   | 55 (46.2)                      | 12 (32.4)                | 38 (32.2)                 | 1.42 (0.621-3.25)                     | 1.56 (0.39-6.26)                     |
| Tertile 3 (> 4.9 µg/dL)     | 36 (30.3)                      | 19 (51.4)                | 39 (33.1)                 | 1.00 (0.417-2.39)                     | 2.81 (0.71-11.1)                     |
|                             |                                |                          | <i>P</i> for trend        | 0.97                                  | 0.13                                 |
| α-Cryptoxanthin             |                                |                          |                           |                                       |                                      |
| Tertile 1 (≤ 44.7 µg/dL)    | 33 (27.7)                      | 12 (32.4)                | 40 (34.2)                 | 1.00 (Ref)                            | 1.00 (Ref)                           |
| Tertile 2 (44.7–82.9 µg/dL) | 34 (28.6)                      | 9 (24.3)                 | 38 (32.5)                 | 1.38 (0.58-3.27)                      | 0.45 (0.11-1.86)                     |
| Tertile 3 (> 82.9 µg/dL)    | 52 (43.7)                      | 16 (43.2)                | 39 (33.3)                 | 1.88 (0.82-4.31)                      | 1.81 (0.57-5.7)                      |
|                             |                                |                          | <i>P</i> for trend        | 0.13                                  | 0.28                                 |
| β-Cryptoxanthin             |                                |                          |                           |                                       |                                      |
| Tertile 1 (≤ 7.8 µg/dL)     | 22 (18.5)                      | 7 (18.9)                 | 40 (33.9)                 | 1.00 (Ref)                            | 1.00 (Ref)                           |
| Tertile 2 (7.8–16.0 µg/dL)  | 39 (32.8)                      | 17 (45.9)                | 39 (33.1)                 | 1.56 (0.64-3.79)                      | 1.98 (0.56-6.98)                     |
| Tertile 3 (>16.0 µg/dL)     | 58 (48.7)                      | 13 (35.1)                | 39 (33.1)                 | 2.07 (0.86-4.94)                      | 1.47 (0.41-5.3)                      |

|                             |           |           |                    |                  |                   |
|-----------------------------|-----------|-----------|--------------------|------------------|-------------------|
|                             |           |           | <i>P</i> for trend | 0.11             | 0.62              |
| $\alpha$ -Carotene          |           |           |                    |                  |                   |
| ≤ Median of 0.50 µg/dL      | 41 (34.5) | 23 (62.2) | 86 (72.9)          | 1.00 (Ref)       | 1.00 (Ref)        |
| > Median of 0.50 µg/dL      | 78 (65.5) | 14 (37.8) | 32 (27.1)          | 4.2 (2.04-8.64)  | 2.15 (0.73-6.35)  |
| $\beta$ -Carotene           |           |           |                    |                  |                   |
| ≤ Median of 4.2 µg/dL       | 21 (17.6) | 9 (24.3)  | 60 (50.8)          | 1.00 (Ref)       | 1.00 (Ref)        |
| > Median of 4.2 µg/dL       | 98 (82.4) | 28 (75.7) | 58 (49.2)          | 3.33 (1.57-7.05) | 3.18 (1.00-10.1)  |
| Lycopene                    |           |           |                    |                  |                   |
| Tertile 1 (≤3.9 µg/dL)      | 32 (27.1) | 15 (40.5) | 40 (34.5)          | 1.00 (Ref)       | 1.00 (Ref)        |
| Tertile 2 (3.9–7.5 µg/dL)   | 35 (29.7) | 9 (24.3)  | 38 (32.8)          | 1.19 (0.50-2.83) | 0.62 (0.17-2.20)  |
| Tertile 3 (>7.5 µg/dL)      | 51 (43.2) | 13 (35.1) | 38 (32.8)          | 1.04 (0.45-2.38) | 0.87 (0.27-2.83)  |
|                             |           |           | <i>P</i> for trend | 0.93             | 0.79              |
| Ubiquinone                  |           |           |                    |                  |                   |
| Tertile 1 ≤ (29.3 µg/dL)    | 25 (21)   | 7 (18.9)  | 40 (34.5)          | 1.00 (Ref)       | 1.00 (Ref)        |
| Tertile 2 (29.3–41.2 µg/dL) | 34 (28.6) | 11 (29.7) | 37 (31.9)          | 1.14 (0.47-2.74) | 3.70 (0.84-16.30) |
| Tertile 3 (>41.2 µg/dL)     | 60 (50.4) | 19 (51.4) | 39 (33.6)          | 2.07 (0.91-4.73) | 6.57 (1.52-28.50) |
|                             |           |           | <i>P</i> for trend | 0.073            | <b>0.012</b>      |
| $\delta$ -Tocopherol        |           |           |                    |                  |                   |
| Tertile 1 (≤ 9.7 µg/dL)     | 50 (42)   | 9 (24.3)  | 40 (33.9)          | 1.00 (Ref)       | 1.00 (Ref)        |
| Tertile 2 (9.7–13.1 µg/dL)  | 34 (28.6) | 11 (29.7) | 39 (33.1)          | 0.93 (0.42-2.08) | 1.85 (0.52-6.55)  |
| Tertile 3 (>13.1 µg/dL)     | 35 (29.4) | 17 (45.9) | 39 (33.1)          | 0.97 (0.43-2.19) | 2.37 (0.68-8.31)  |
|                             |           |           | <i>P</i> for trend | 0.93             | 0.18              |

|                                            |           |           |                    |                   |                   |
|--------------------------------------------|-----------|-----------|--------------------|-------------------|-------------------|
| $\gamma$ -Tocopherol                       |           |           |                    |                   |                   |
| Tertile 1 ( $\leq 47.2$ $\mu\text{g/dL}$ ) | 40 (33.6) | 14 (37.8) | 41 (34.7)          | 1.00 (Ref)        | 1.00 (Ref)        |
| Tertile 2 (47.2–74.9 $\mu\text{g/dL}$ )    | 53 (44.5) | 13 (35.1) | 38 (32.2)          | 2.13 (0.933-4.85) | 1.53 (0.44-5.30)  |
| Tertile 3 ( $>74.9$ $\mu\text{g/dL}$ )     | 26 (21.8) | 10 (27)   | 39 (33.1)          | 0.627 (0.26-1.49) | 0.70 (0.20-2.33)  |
|                                            |           |           | <i>P</i> for trend | 0.38              | 0.57              |
| $\alpha$ -Tocopherol                       |           |           |                    |                   |                   |
| $\leq$ Median of 1402 $\mu\text{g/dL}$     | 40 (33.6) | 9 (24.3)  | 59 (50)            | 1.00 (Ref)        | 1.00 (Ref)        |
| $>$ Median of 1402 $\mu\text{g/dL}$        | 79 (66.4) | 28 (75.7) | 59 (50)            | 1.99 (0.99-4.01)  | 8.10 (2.2-29.9)   |
| $\delta$ -Tocotrienol                      |           |           |                    |                   |                   |
| $\leq$ Median of 0.9 $\mu\text{g/dL}$      | 38 (31.9) | 11 (29.7) | 64 (54.2)          | 1.00 (Ref)        | 1.00 (Ref)        |
| $>$ Median of 0.9 $\mu\text{g/dL}$         | 81 (68.1) | 26 (70.3) | 54 (45.8)          | 1.93 (0.96-3.88)  | 2.02 (0.74-5.54)  |
| $\gamma$ -Tocotrienol                      |           |           |                    |                   |                   |
| Tertile 1 ( $\leq 0.9$ $\mu\text{g/dL}$ )  | 34 (28.6) | 9 (24.3)  | 41 (34.7)          | 1.00 (Ref)        | 1.00 (Ref)        |
| Tertile 2 (0.9–1.5 $\mu\text{g/dL}$ )      | 28 (23.5) | 10 (27)   | 43 (36.4)          | 0.97 (0.40-2.32)  | 1.09 (0.50-7.15)  |
| Tertile 3 ( $>1.5$ $\mu\text{g/dL}$ )      | 57 (47.9) | 18 (48.6) | 34 (28.8)          | 3.52 (1.49-8.32)  | 2.99 (0.88-10.10) |
|                                            |           |           | <i>P</i> for trend | <b>0.0035</b>     | 0.078             |
| $\alpha$ -Tocotrienol                      |           |           |                    |                   |                   |
| Tertile 1 ( $\leq 0.9$ $\mu\text{g/dL}$ )  | 31 (26.1) | 8 (21.6)  | 44 (37.3)          | 1.00 (Ref)        | 1.00 (Ref)        |
| Tertile 2 (0.9–1.5 $\mu\text{g/dL}$ )      | 29 (24.4) | 6 (16.2)  | 35 (29.7)          | 1.16 (0.49-2.73)  | 0.76 (0.17-3.44)  |
| Tertile 3 ( $>1.5$ $\mu\text{g/dL}$ )      | 59 (49.6) | 23 (62.2) | 39 (33.1)          | 2.53 (1.12-5.72)  | 4.79 (1.39-16.50) |
|                                            |           |           | <i>P</i> for trend | <b>0.024</b>      | <b>0.0088</b>     |

<sup>a</sup> Stage of prostate cancer was based on the sixth edition of the TNM (tumor–node– metastasis) staging system, with cases being classified as ‘Localized’ (T1 or T2, N0, M0) or ‘Advanced’ (a) M0, T3/T4 & N0; (b) T1-T4 with any N; (c) any T, any N and (d) M1, M1b, M1c).



---

<sup>b</sup> Multiple logistic regression model adjusted for age, education, family cancer history, BMI, sun exposure, skin colour, and eye colour. CI, confidence interval; OR, odds ratio.

**Supplementary Table S5. Spearman's correlation coefficients between serum concentrations of micronutrients**

|                         | Retinol     | Lutein      | Zeaxanthin  | $\alpha$ -Cryptoxanthin | $\beta$ -Cryptoxanthin | $\alpha$ -Carotene | $\beta$ -Carotene | Lycopene    | Ubiquinone  | $\delta$ -Tocopherol | $\gamma$ -Tocopherol | $\alpha$ -Tocopherol | $\delta$ -Tocotrienol | $\gamma$ -Tocotrienol | $\alpha$ -Tocotrienol |
|-------------------------|-------------|-------------|-------------|-------------------------|------------------------|--------------------|-------------------|-------------|-------------|----------------------|----------------------|----------------------|-----------------------|-----------------------|-----------------------|
| Retinol                 | 1.000       |             |             |                         |                        |                    |                   |             |             |                      |                      |                      |                       |                       |                       |
| Lutein                  | <b>0.35</b> | 1.000       |             |                         |                        |                    |                   |             |             |                      |                      |                      |                       |                       |                       |
| Zeaxanthin              | <b>0.30</b> | <b>0.24</b> | 1.000       |                         |                        |                    |                   |             |             |                      |                      |                      |                       |                       |                       |
| $\alpha$ -Cryptoxanthin | 0.12        | <b>0.24</b> | 0.15        | 1.000                   |                        |                    |                   |             |             |                      |                      |                      |                       |                       |                       |
| $\beta$ -Cryptoxanthin  | <b>0.22</b> | <b>0.32</b> | <b>0.24</b> | <b>0.74</b>             | 1.000                  |                    |                   |             |             |                      |                      |                      |                       |                       |                       |
| $\alpha$ -Carotene      | <b>0.28</b> | <b>0.48</b> | 0.01        | <b>0.25</b>             | <b>0.35</b>            | 1.00               |                   |             |             |                      |                      |                      |                       |                       |                       |
| $\beta$ -Carotene       | <b>0.33</b> | <b>0.56</b> | 0.13        | <b>0.41</b>             | <b>0.61</b>            | <b>0.72</b>        | 1.000             |             |             |                      |                      |                      |                       |                       |                       |
| Lycopene                | <b>0.18</b> | 0.14        | <b>0.21</b> | <b>0.34</b>             | <b>0.55</b>            | <b>0.34</b>        | <b>0.50</b>       | 1.00        |             |                      |                      |                      |                       |                       |                       |
| Ubiquinone              | <b>0.33</b> | <b>0.30</b> | <b>0.44</b> | -0.01                   | 0.13                   | <b>0.21</b>        | <b>0.26</b>       | <b>0.27</b> | 1.000       |                      |                      |                      |                       |                       |                       |
| $\delta$ -Tocopherol    | <b>0.20</b> | 0.03        | <b>0.23</b> | -0.06                   | -0.10                  | -0.09              | -0.09             | 0.01        | <b>0.40</b> | 1.000                |                      |                      |                       |                       |                       |
| $\gamma$ -Tocopherol    | 0.13        | 0.11        | 0.10        | 0.06                    | -0.00                  | 0.02               | -0.01             | 0.01        | <b>0.17</b> | <b>0.65</b>          | 1.000                |                      |                       |                       |                       |
| $\alpha$ -Tocopherol    | <b>0.46</b> | <b>0.30</b> | <b>0.33</b> | <b>0.16</b>             | <b>0.25</b>            | <b>0.20</b>        | <b>0.31</b>       | <b>0.19</b> | <b>0.54</b> | <b>0.35</b>          | <b>0.23</b>          | 1.000                |                       |                       |                       |
| $\delta$ -Tocotrienol   | 0.24        | <b>0.32</b> | <b>0.38</b> | 0.02                    | 0.11                   | 0.14               | <b>0.20</b>       | 0.12        | <b>0.37</b> | <b>0.20</b>          | 0.08                 | 0.16                 | 1.000                 |                       |                       |
| $\gamma$ -Tocotrienol   | 0.19        | <b>0.23</b> | <b>0.25</b> | -0.02                   | -0.00                  | 0.04               | 0.07              | -0.06       | <b>0.34</b> | <b>0.49</b>          | <b>0.18</b>          | <b>0.24</b>          | <b>0.51</b>           | 1.000                 |                       |
| $\alpha$ -Tocotrienol   | 0.17        | <b>0.18</b> | <b>0.30</b> | -0.05                   | -0.06                  | 0.07               | 0.07              | 0.05        | <b>0.35</b> | <b>0.48</b>          | 0.11                 | <b>0.18</b>          | <b>0.46</b>           | <b>0.67</b>           | 1.000                 |

Correlations that are statistically significant ( $P$ -value < 0.01) are in bold.
